# Supplementary material for: A simple approach to determining the efficacy of antiperspirants using paper-based colorimetric paper sensors: SweatSENSE
Source: Royal Society of Chemistry journal article supplement (doi:10.1039/d3lp00214d), 2024-01-01
Supplement: d3lp00214d1.pdf [file d3lp00214d1.pdf]

# A simple approach to determining the efficacy of antiperspirants using paper-based colorimetric paper sensors: SweatSense

Rachel A. Hand,<sup>a\*</sup> Spyridon Efstathiou,<sup>a</sup> Alan M. Wemyss,<sup>a</sup> Maria Grypioti,<sup>a †</sup> Gavin Kirby,<sup>a</sup> Tammie Barlow,<sup>a</sup> Emmett Cullen Tinley,<sup>b</sup> Jane Ford,<sup>b</sup> Andy Jamieson,<sup>b</sup> Janette Reynolds,<sup>b</sup> Jean Miller,<sup>b</sup> Susan Bates,<sup>b</sup> Ezat Khoshdel,<sup>a,b</sup> David M. Haddleton<sup>\*a</sup>

<sup>a</sup>Department of Chemistry, University of Warwick, Coventry, CV4 7AL, UK

<sup>b</sup>Unilever Research, Port Sunlight, Bebington CH63 3JW, UK

[\\*Rachel.A.Hand@warwick.ac.uk](mailto:Rachel.A.Hand@warwick.ac.uk), [D.M.Haddleton@warwick.ac.uk](mailto:D.M.Haddleton@warwick.ac.uk)

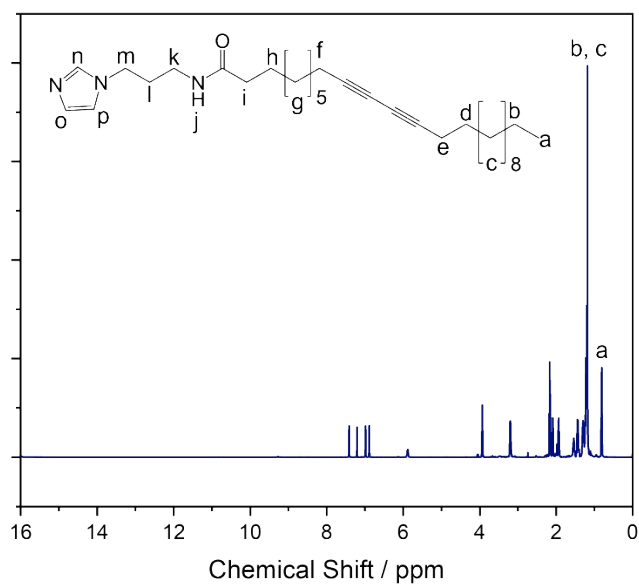

Figure S1. <sup>1</sup>H NMR spectrum of PCDA-I

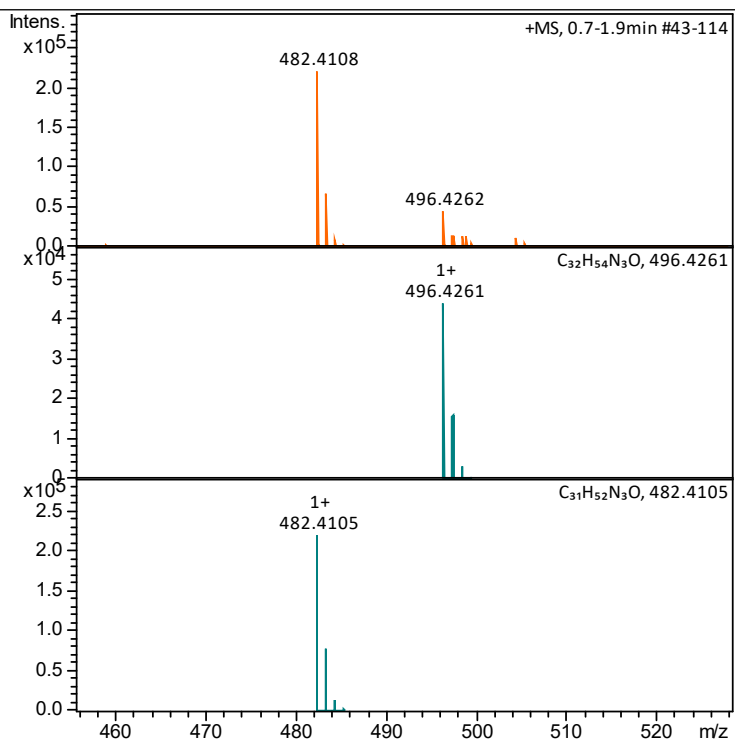

Figure S2: High resolution mass spectrometry of PCDA-I+H derivative

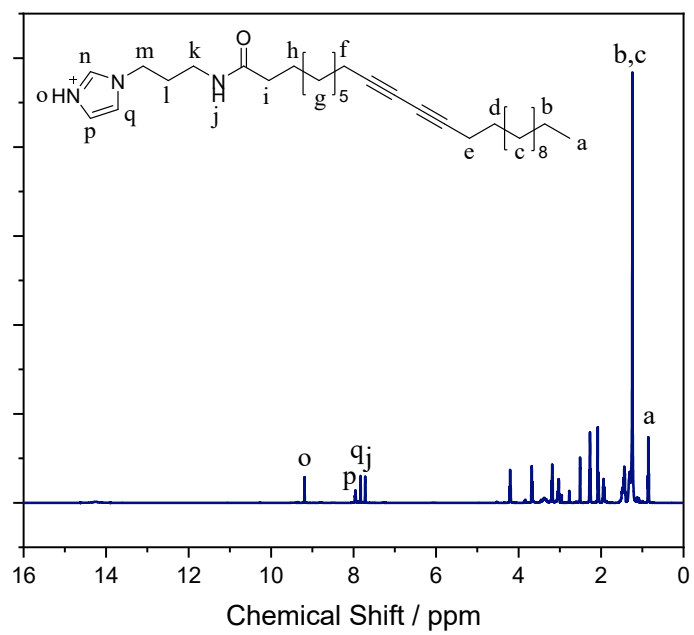

Figure S3. <sup>1</sup>H NMR spectrum of PCDA-I<sup>+</sup>H

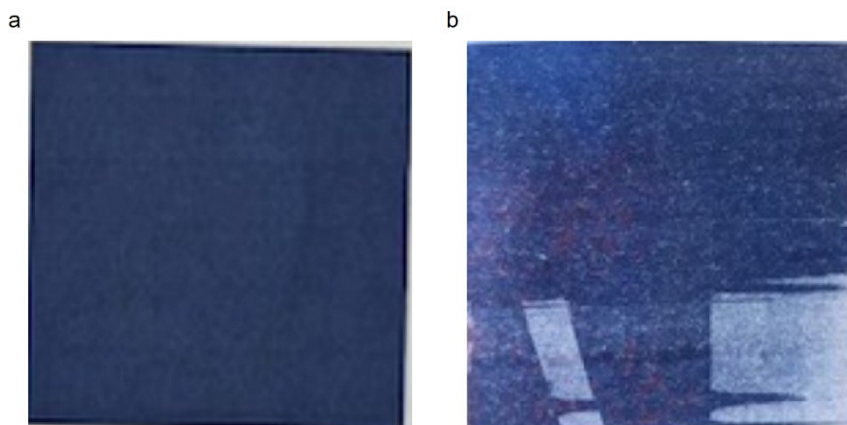

Figure S4. Comparison of a well uniformed patch versus a non-uniform low quality one.

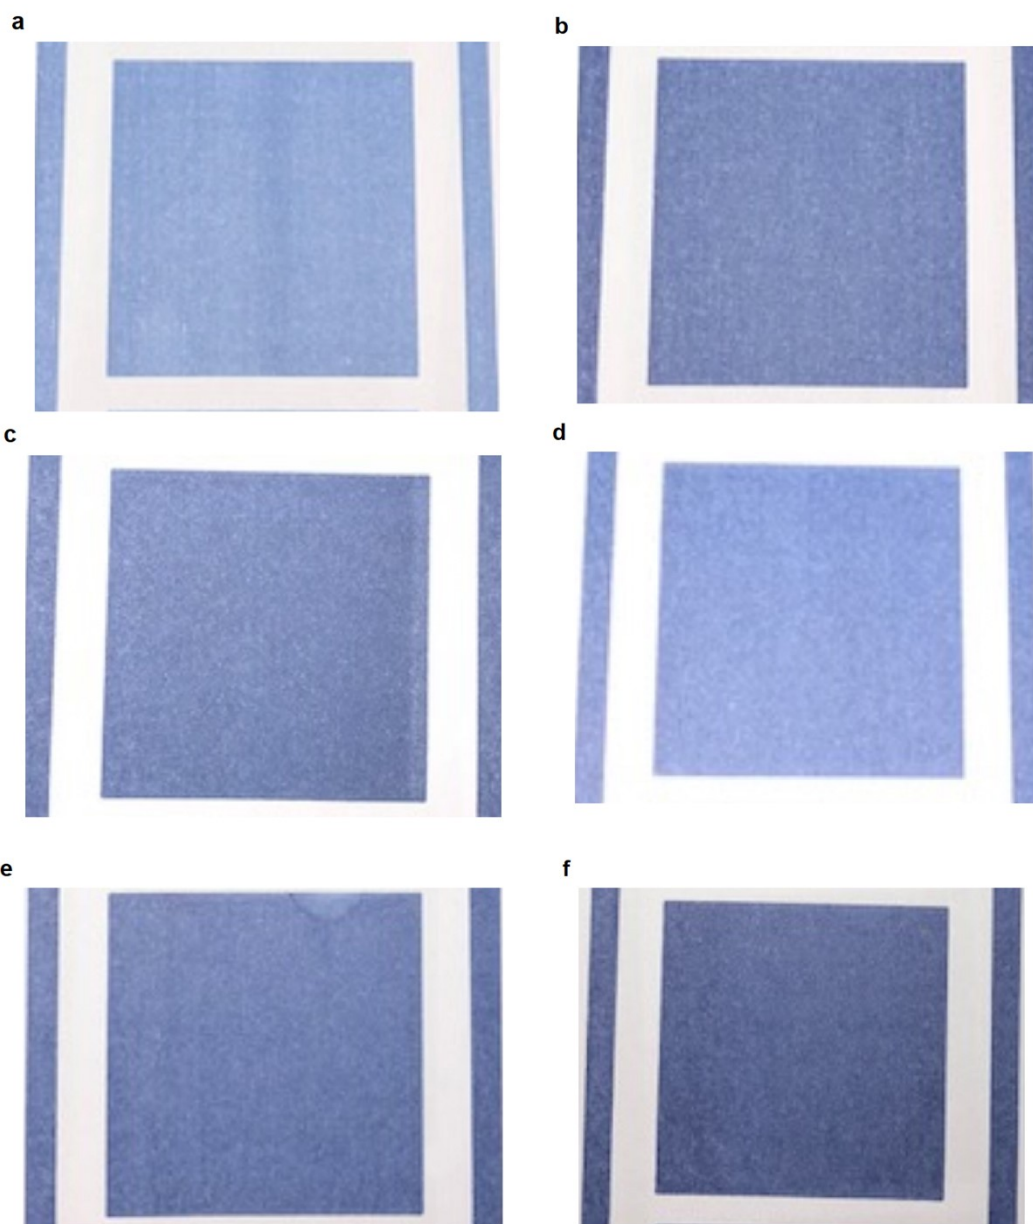

Figure S5. The visual effect of curing time and irradiation energy on PCDA-I+H patches cured under a) 6 sec with  $5,000 \mu\text{J}/\text{cm}^2$  b) 6 sec with  $500,000 \mu\text{J}/\text{cm}^2$  c) 12 sec with  $5,000 \mu\text{J}/\text{cm}^2$  d) 12 sec with  $500,000 \mu\text{J}/\text{cm}^2$  e) 18 sec with  $5,000 \mu\text{J}/\text{cm}^2$  and f) 18 sec with  $500,000 \mu\text{J}/\text{cm}^2$

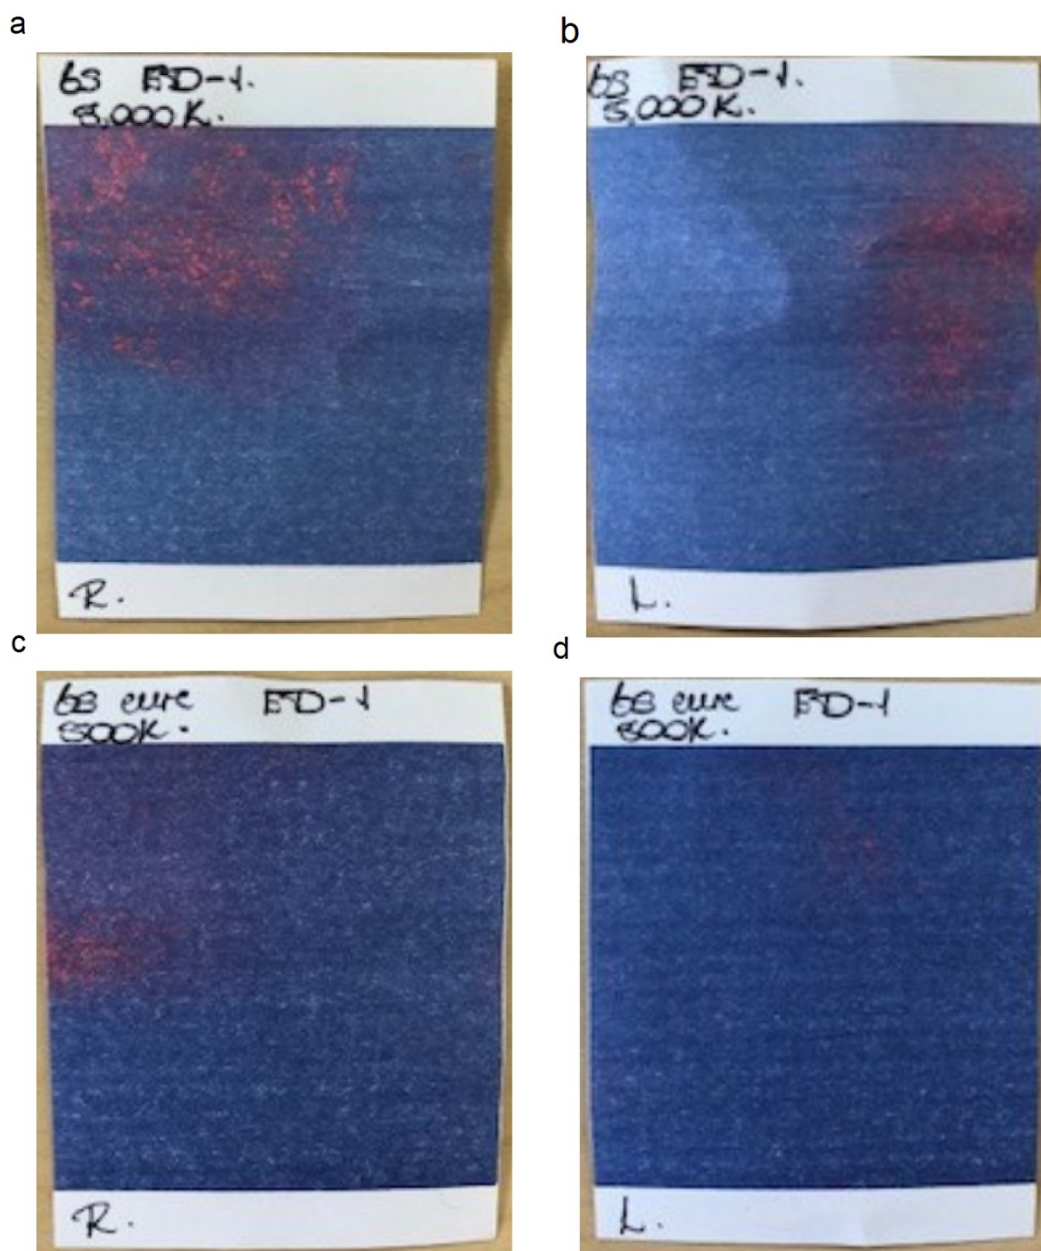

Figure S6. Hot room results of right and left underarms using 6 sec cured PCDA-I<sup>+</sup>H patches after 5,000 and 500,000  $\mu\text{J}/\text{cm}^2$  irradiation respectively.

a

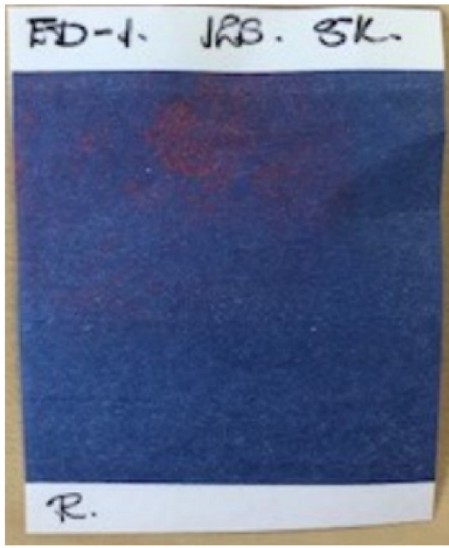

b

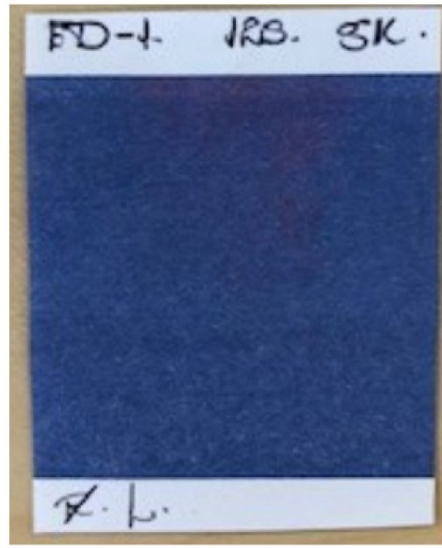

c

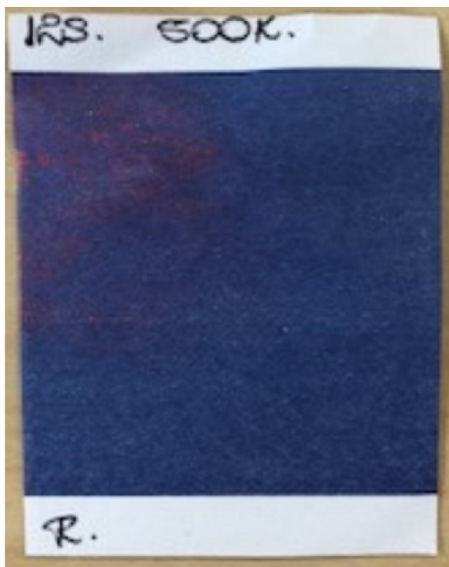

d

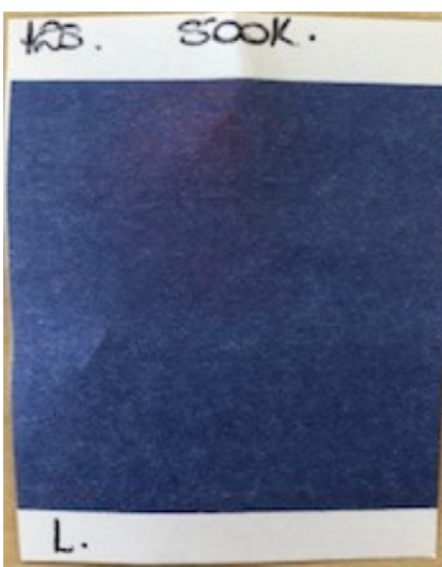

Figure S7. Hot room results of right and left underarms using 12 sec cured PCDA-I<sup>+</sup>H patches after 5,000 and 500,000  $\mu\text{J}/\text{cm}^2$  irradiation respectively.

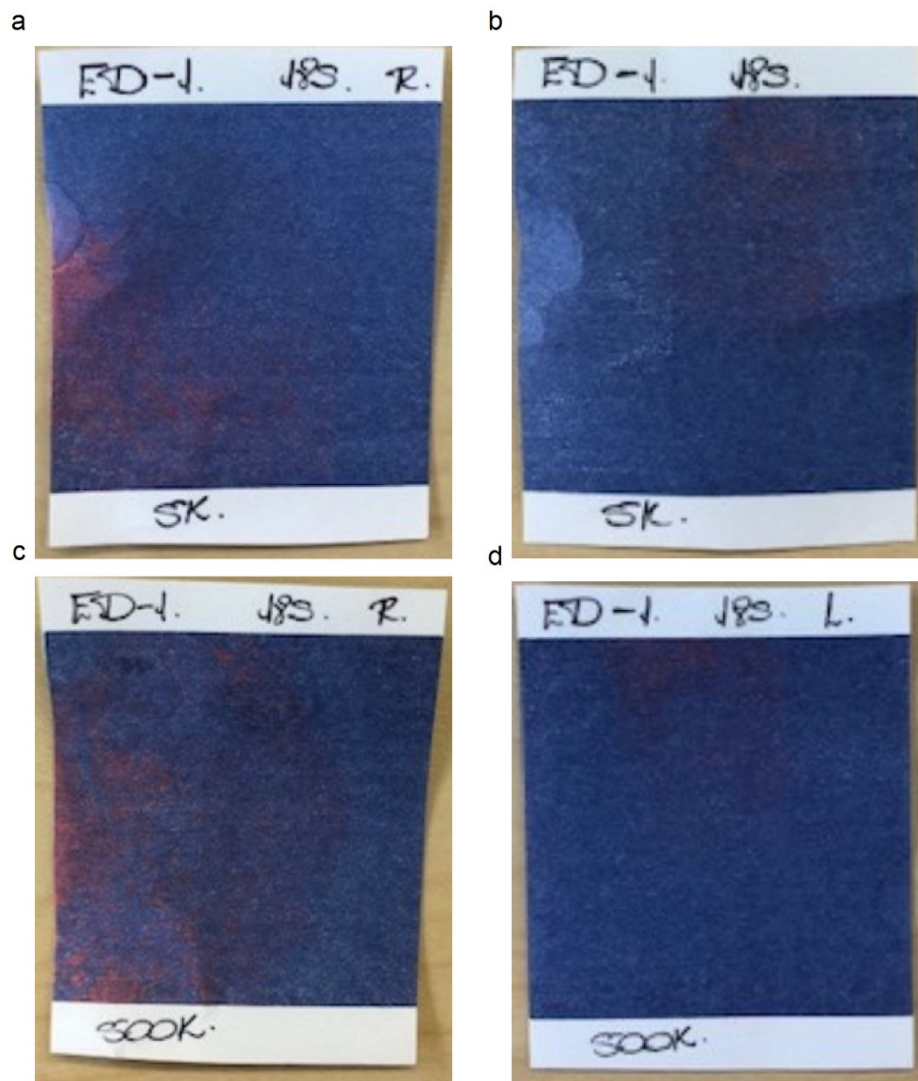

Figure S8. Hot room results of right and left underarms using 18 sec cured PCDA-I<sup>+</sup>H patches after 5,000 and 500,000  $\mu\text{J}/\text{cm}^2$  irradiation respectively.

Table S1. Hot room performance evaluation of PCDA-I<sup>+</sup>H sensors made under different curing times and irradiation energies.

| Insert | Time (sec) | Energy ( $\mu\text{J}/\text{cm}^2$ ) | Sensor Uniformity | Contrast | Droplet clarity | Droplet spreading | Overall |
|--------|------------|--------------------------------------|-------------------|----------|-----------------|-------------------|---------|
| 1      | 6          | 5,000                                | poor              | good     | good            | high              | ✓       |
| 2      | 6          | 500,000                              | poor              | poor     | poor            | least             | ✗       |
| 3      | 12         | 5,000                                | good              | good     | good            | least             | ✓       |
| 4      | 12         | 500,000                              | good              | good     | poor            | high              | ✗       |
| 5      | 18         | 5,000                                | poor              | poor     | poor            | high              | ✗       |
| 6      | 18         | 500,000                              | poor              | poor     | poor            | least             | ✗       |

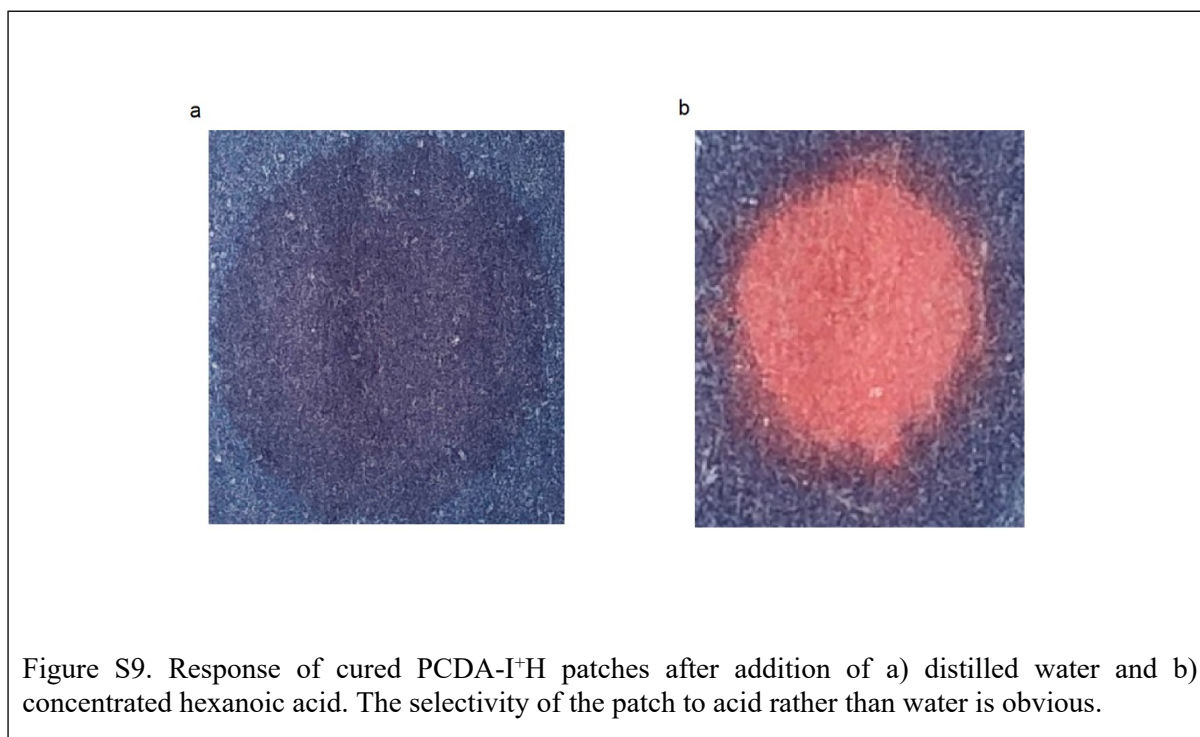

Figure S9. Response of cured PCDA-I<sup>+</sup>H patches after addition of a) distilled water and b) concentrated hexanoic acid. The selectivity of the patch to acid rather than water is obvious.



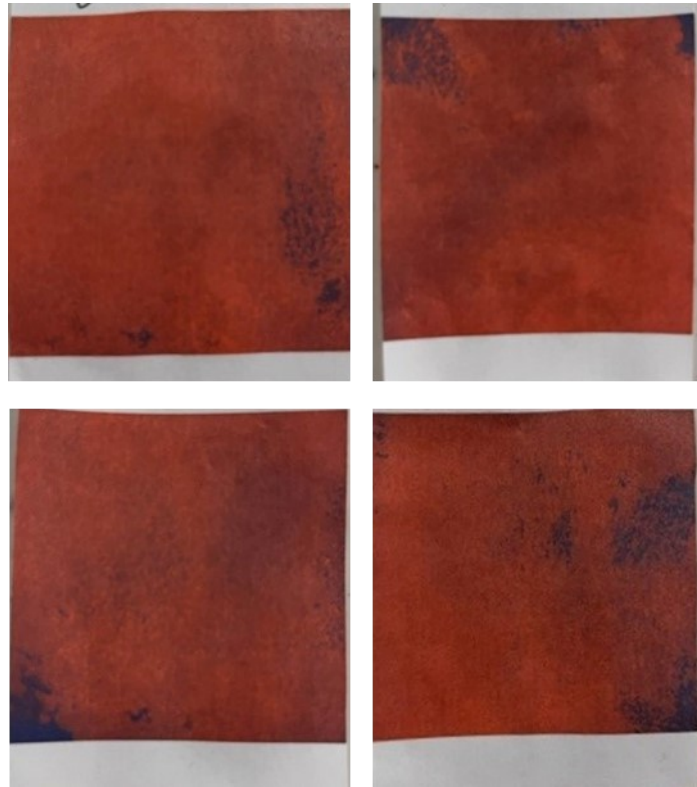

Figure S10. Example hot room results of a person sweating prior to any antiperspirant usage, the “untreated” sweat.

Table S2. Hot room performance evaluation of PCDA-I<sup>+</sup>H sensors split into three subcategories (a) light, (b) moderate and (c) heavy sweaters.

| <b>Panelist Number</b> | <b>AP or No AP</b> | <b>Sweat Area (mm<sup>2</sup>)</b> | <b>% Total Coverage</b> | <b>Sweat Weight (mg)</b> | <b>Image Reference</b> |
|------------------------|--------------------|------------------------------------|-------------------------|--------------------------|------------------------|
| 8                      | No AP              | 66.48                              | 2.65                    | 323                      | DEO-HOT-8112-00003-5   |
| 15                     | No AP              | 24.77                              | 1.01                    | 288                      | DEO-HOT-8112-00003-4   |
| 33                     | No AP              | 76.88                              | 3.09                    | 316                      | DEO-HOT-8114-00003-4   |
| 1                      | No AP              | 43.15                              | 1.84                    | 264                      | DEO-HOT-8114-00001-7   |
| 29                     | No AP              | 79.24                              | 3.58                    | 277                      | DEO-HOT-8103-00005-8   |
| 8                      | AP                 | 11.13                              | 0.389                   | 138                      | DEO-HOT-8117-00002-5   |
| 15                     | AP                 | 5.81                               | 0.22                    | 145                      | DEO-HOT-8117-00001-8   |
| 33                     | AP                 | 6.03                               | 0.25                    | 124                      | DEO-HOT-8117-00001-4   |
| 1                      | AP                 | 5.31                               | 0.18                    | 117                      | DEO-HOT-8117-00001-1   |
| 29                     | AP                 | 21.41                              | 0.85                    | 148                      | DEO-HOT-8117-00001-2   |

Table S2 continued.

| <b>Panelist Number</b> | <b>AP or No AP</b> | <b>Sweat Area (mm<sup>2</sup>)</b> | <b>% Total Coverage</b> | <b>Sweat Weight (mg)</b> | <b>Image Reference</b> |
|------------------------|--------------------|------------------------------------|-------------------------|--------------------------|------------------------|
| 17                     | No AP              | 1112.242                           | 46.61                   | 523                      | DEO-HOT-8120-00001-2   |
| 5                      | No AP              | 1176.924                           | 47.65                   | 551                      | DEO-HOT-8120-00002-1   |
| 19                     | No AP              | 1329.965                           | 54.00                   | 582                      | DEO-HOT-8120-00002-9   |
| 22                     | No AP              | 956.2812                           | 41.71                   | 497                      | DEO-HOT-8120-00004-5   |
| 26                     | No AP              | 1042                               | 44.56                   | 563                      | DEO-HOT-8121-00001-4   |
| 17                     | AP                 | 130.9                              | 5.56                    | 219                      | DEO-HOT-8120-00003-2   |
| 5                      | AP                 | 102.4                              | 4.30                    | 248                      | DEO-HOT-8113-00002-1   |
| 19                     | AP                 | 98.5                               | 4.32                    | 194                      | DEO-HOT-8113-00001-10  |
| 22                     | AP                 | 107.4                              | 4.59                    | 232                      | DEO-HOT-8112-00003-7   |
| 26                     | AP                 | 158.0                              | 6.97                    | 316                      | DEO-HOT-8112-00003-3   |

Table S2 continued.

| <b>Panelist Number</b> | <b>AP or No AP</b> | <b>Sweat Area (mm<sup>2</sup>)</b> | <b>% Total Coverage</b> | <b>Sweat Weight (mg)</b> | <b>Image Reference</b> |
|------------------------|--------------------|------------------------------------|-------------------------|--------------------------|------------------------|
| 37                     | No AP              | 2029                               | 87.23                   | 763                      | DEO-HOT-8107-00002-1   |
| 52                     | No AP              | 1930                               | 83.27                   | 722                      | DEO-HOT-8107-00002-3   |
| 9                      | No AP              | 2029                               | 86.51                   | 789                      | DEO-HOT-8107-00001-7   |
| 24                     | No AP              | 1999                               | 85.05                   | 813                      | DEO-HOT-8107-00001-8   |
| 16                     | No AP              | 1992                               | 85.42                   | 707                      | DEO-HOT-8107-00001-10  |
| 37                     | AP                 | 111.53                             | 4.87                    | 248                      | DEO-HOT-8116-00002-2   |
| 52                     | AP                 | 311.0                              | 14.08                   | 398                      | DEO-HOT-8116-00001-3   |
| 9                      | AP                 | 193.1                              | 8.63                    | 267                      | DEO-HOT-8116-00002-7   |
| 24                     | AP                 | 278.9                              | 12.67                   | 311                      | DEO-HOT-8116-00003-3   |
| 16                     | AP                 | 293.9                              | 12.63                   | 224                      | DEO-HOT-8116-00002-6   |
